# Supplementary material
Source: PubMed Central journal article supplement (PMC3612939)
Supplement: NIHMS452802-supplement-1_si_001.pdf [file NIHMS452802-supplement-1_si_001.pdf]

SUPPORTING INFORMATION FOR

**Mechanism and Specificity of an Acyltransferase Domain  
from a Modular Polyketide Synthase**

Briana J. Dunn<sup>†</sup>, David E. Cane<sup>#</sup>, and Chaitan Khosla<sup>\*,†,‡</sup>

<sup>†</sup>Departments of Chemical Engineering, and <sup>‡</sup>Chemistry and Biochemistry,  
Stanford University, Stanford, California 94305

<sup>#</sup>Department of Chemistry, Box H, Brown University, Providence, Rhode Island  
02912.

\*To whom correspondence should be addressed. E-mail: khosla@stanford.edu.  
Telephone: (650) 723-6538. Fax: (650) 725-7294.

## Materials and Methods

### *Reagents and Chemicals*

Methylmalonyl CoA, malonyl CoA, propionyl CoA,  $\beta$ -NAD<sup>+</sup>, NADH,  $\alpha$ -ketoglutarate dehydrogenase (porcine heart) ( $\alpha$ KGDH),  $\alpha$ -ketoglutaric acid, thiamine pyrophosphate (TPP), and EDTA were purchased from Sigma. TCEP was from CalBioChem. BSA was from New England Biosciences. IPTG was from Gold Biotechnology. Ni-NTA affinity resin was from Qiagen and SDS-PAGE gradient gels were from Bio-Rad. The Hi-Trap Q anion exchange column was from GE Healthcare.

### *DNA Constructs*

DEBS AT3, ACP3, and ACP6 were expressed from plasmids pAYC47<sup>1</sup>, pVYA05<sup>2</sup>, and pFW55<sup>3</sup> respectively. Point mutants of DEBS AT3 were created using the Quikchange Site-directed Mutagenesis Kit (Agilent). The Q652L mutant (pBD35) was created with primer 5'-GTCGTGGGGCACTCGCTCGGCGAGATCGCCGCC-3' and its antiparallel complement using pAYC47 as the template. The Y751H/S753F mutant (pBD38) was created in two steps. The Y751H mutant (pBD43) was created with primer 5'-GACATCGACGTGGACCACGCCTCGCACTCGCCG-3' and its antiparallel complement using pAYC47 as the template. pBD38 was then created using primer 5'-GACGTGGACCACGCCTTCCACTCGCCGCAGATC-3' and its antiparallel complement using pBD43 as the template. All mutations were confirmed by sequencing.

### *Protein Expression and Purification*

All plasmids were electrically transformed into *E.coli* BAP1<sup>4</sup> cells for protein expression except in the case of apo-ACP3, which was produced in *E.coli* BL21. Proteins were expressed and purified as described previously<sup>5</sup> with the addition of a second elution step from the Ni-NTA resin (2 resin volumes; 150 mM sodium phosphate, pH 7.6, 50 mM sodium chloride, 8% glycerol, 450 mM imidazole). Eluted

protein fractions were combined and applied to the HiTrap Q anion exchange column.

Phosphopantetheinylation of ACP proteins was confirmed by MALDI-TOF mass spectrometry.

### Fluorometric Assays

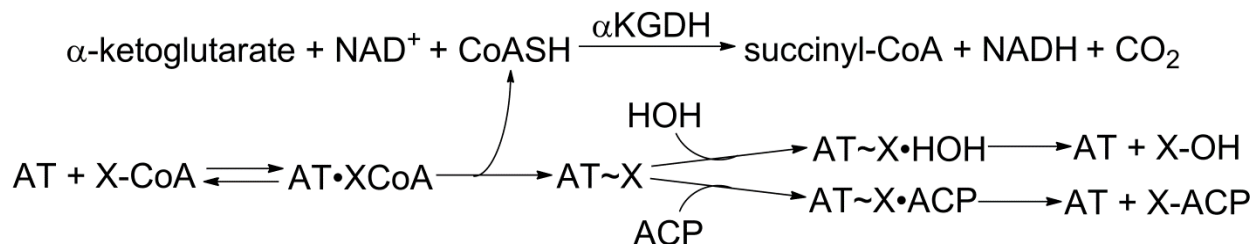

**Scheme S1.** Coupling of AT catalysis to  $\alpha$ KGDH activity. AT-catalyzed release of free Coenzyme A (CoASH) is coupled to the formation of NADH in the  $\alpha$ -KGDH-catalyzed conversion of  $\alpha$ -ketoglutarate to succinyl-CoA, thereby allowing continuous and sensitive fluorometric monitoring of AT activity.

Assays were adapted from a malonyl-CoA:acyl carrier protein transacylase assay described previously.<sup>6</sup> Specifically, assays were run in 96-well microtiter plates (black polystyrene, flat bottom, half area, non-binding surface, Corning). NADH fluorescence was monitored using a Synergy H4 Hybrid Multi-Mode Microplate Reader (BioTek). Samples were illuminated with a tungsten light source and a 360 nm filter, and fluorescence emission was monitored using a 400 nm dichroic mirror with a 460 nm filter. All measurements were made with a sensitivity setting of 85. Reactions were run for five minutes using the minimum interval between measurements.

Assay components were prepared in three different solutions: solution (1) contained the acyl carrier protein (ACP),  $\alpha$ KGDH, NAD<sup>+</sup>, TPP, and  $\alpha$ -ketoglutaric acid at four times their final concentration; solution (2) contained the acyl-CoA substrate prepared at four times its final concentration; and solution (3) contained the acyltransferase (AT) domain prepared at twice its final concentration. All solutions were prepared in 50 mM sodium phosphate buffer, pH 7.6, 10% glycerol, 1 mM TCEP, and 1 mM EDTA. The 2X AT solution also contained 0.1 mg/mL BSA. Solutions were added to the wells in the following order:

25  $\mu\text{L}$  of solution (1), 25  $\mu\text{L}$  of solution (2), and 50  $\mu\text{L}$  of solution (3), which initiated the reaction. Combination of solutions (1) and (2) prior to the start of measurement allowed any free Coenzyme A in the acyl-CoA stock to be consumed, therefore avoiding its interference with the detection of AT-mediated Coenzyme A production. Final assay concentrations were: 50 mM sodium phosphate, pH 7.6, 10% glycerol, 1 mM TCEP, 1 mM EDTA, 0.4 mU/ $\mu\text{L}$   $\alpha\text{KGDH}$ , 0.4 mM  $\text{NAD}^+$ , 0.4 mM TPP, 2 mM  $\alpha$ -ketoglutaric acid, and 0.05 mg/mL BSA. AT, ACP, and acyl-CoA concentrations were varied as described below.

**DEBS AT3-mediated substrate hydrolysis:** Reactions were run with 200 nM DEBS AT3 in the absence of *holo*-ACP (except when the inactive *apo*-ACP3 surrogate was used), over methylmalonyl-CoA, malonyl-CoA, and propionyl-CoA concentrations of zero to 100  $\mu\text{M}$ . When the *apo*-ACP3 surrogate was used (Figure 1), reactions were run over methylmalonyl-CoA concentrations of zero to 100  $\mu\text{M}$ . The *apo*-ACP3 concentration was 100  $\mu\text{M}$ . 0  $\mu\text{M}$  AT3 controls were run in parallel. All data points were obtained in triplicate.

**Acyl-CoA saturation kinetics for DEBS AT3:** Reactions were run with 200 nM DEBS AT3 and 100  $\mu\text{M}$  DEBS *holo*-ACP3 over methylmalonyl-CoA, malonyl-CoA, and propionyl-CoA concentrations of zero to 200  $\mu\text{M}$ . 0  $\mu\text{M}$  AT3 controls were run in parallel. All data points were obtained in triplicate.

**ACP saturation kinetics for DEBS AT3:** DEBS ACP3 reactions were run with 200 nM DEBS AT3 and 150  $\mu\text{M}$  methylmalonyl-CoA over *holo*-ACP3 concentrations of zero to 200  $\mu\text{M}$ . DEBS ACP6 reactions were run with 2  $\mu\text{M}$  DEBS AT3 over *holo*-ACP6 concentrations of zero to 200  $\mu\text{M}$ . 0  $\mu\text{M}$  AT3 controls were run in parallel. All data points were obtained in triplicate.

**Mutant DEBS AT3 kinetics:** Reactions were run with 10  $\mu\text{M}$  BD35 and BD38 in the presence of 100  $\mu\text{M}$  DEBS *holo*-ACP3 and 150  $\mu\text{M}$  methylmalonyl-CoA or malonyl-CoA. 0  $\mu\text{M}$  AT3 controls were run in parallel. All reactions were run in triplicate.

### Data Analysis

Initial velocities were defined as the linear portion of the product concentration vs. time curve over consumption of 20% or less of the limiting substrate, comprising at least two enzymatic turnovers. Initial rates of the no-AT control reactions were subtracted from their enzyme-containing counterparts. Initial velocity vs. concentration curves were fit to the Michaelis-Menten equation using the curve fitting tool in MATLAB to define kinetic parameters. The *holo*-ACP titration curves were fit to a slightly altered form of the Michaelis-Menten equation that included the addition of a constant to account for the zero *holo*-ACP hydrolysis rate.

### Kinetic Analysis of AT Catalysis

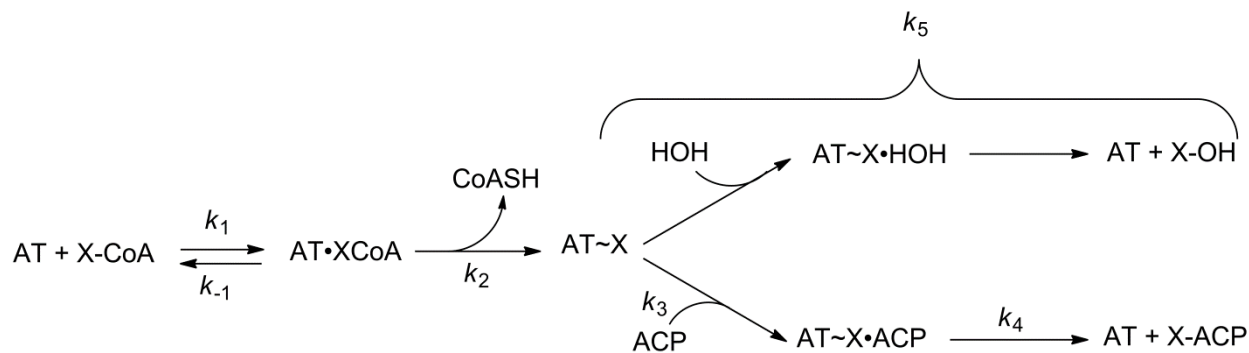

**Scheme S2.** Ping-pong mechanism of the AT-catalyzed transacylation of a (methyl)malonyl-CoA (XCoA) substrate to a (methyl)malonyl-ACP (X-ACP) with defined rate constants. Transacylation requires *holo*-ACP, which contains the nucleophilic phosphopantetheine prosthetic group (see Figure S2). Non-productive partitioning of the acyl enzyme intermediate by competing hydrolysis is shown in the top branch of the mechanism.

*Derivation of Kinetic Parameters Describing  $\alpha$ -carboxyacetyl-CoA-limited AT Catalysis*

Rate constants are as defined in Scheme S2. Note that the value of the specificity constant,  $k_{\text{cat}}/K_M$ , for AT-catalyzed hydrolysis is identical to that for AT-catalyzed transacylation and that in both cases this parameter is independent of the rate of breakdown of the (methyl)malonyl-enzyme intermediate.

**Hydrolysis:**

$$\boxed{k_{\text{cat}}/K_M = \frac{k_1 k_2}{k_{-1} + k_2} \quad k_{\text{cat}} = \frac{k_2 k_5}{k_2 + k_5}}$$

$$\frac{d[\text{X-OH}]}{dt} = k_5 [\text{AT-X}]$$

$$\frac{d[\text{AT-X}]}{dt} = k_2 [\text{AT} \cdot \text{XCoA}] - k_5 [\text{AT-X}]$$

$$\frac{d[\text{AT} \cdot \text{XCoA}]}{dt} = k_1 [\text{AT}][\text{XCoA}] - k_{-1} [\text{AT} \cdot \text{XCoA}] - k_2 [\text{AT} \cdot \text{XCoA}] \cong 0$$

$$[\text{AT} \cdot \text{XCoA}] = \frac{k_1}{k_{-1} + k_2} [\text{AT}][\text{XCoA}]$$

$$[\text{AT}] = [\text{AT}]_o - [\text{AT} \cdot \text{XCoA}] - [\text{AT-X}] - [\text{AT-X} \cdot \text{OH}]$$

Neglecting  $[\text{AT-X} \cdot \text{OH}]$ ,

$$[\text{AT} \cdot \text{XCoA}] = \frac{k_1}{k_{-1} + k_2} ([\text{AT}]_o - [\text{AT} \cdot \text{XCoA}] - [\text{AT-X}]) [\text{XCoA}]$$

$$[\text{AT} \cdot \text{XCoA}] = \frac{\frac{k_1 [\text{XCoA}]}{k_{-1} + k_2} ([\text{AT}]_o - [\text{AT-X}])}{1 + \frac{k_1 [\text{XCoA}]}{k_{-1} + k_2}}$$

$$\frac{d[\text{AT-X}]}{dt} = \frac{\frac{k_1 k_2 [\text{XCoA}]}{k_{-1} + k_2} ([\text{AT}]_o - [\text{AT-X}])}{1 + \frac{k_1 [\text{XCoA}]}{k_{-1} + k_2}} - k_5 [\text{AT-X}] \cong 0$$

$$[\text{AT-X}] = \frac{\frac{k_1 k_2}{k_{-1} + k_2} [\text{XCoA}] [\text{AT}]_o}{k_5 + [\text{XCoA}] \frac{k_1 k_5 + k_1 k_2}{k_{-1} + k_2}} = \frac{\frac{k_2}{k_2 + k_5} [\text{XCoA}] [\text{AT}]_o}{\frac{k_5 (k_{-1} + k_2)}{k_1 (k_2 + k_5)} + [\text{XCoA}]}$$

$$\frac{d[X-OH]}{dt} = \frac{\frac{k_2 k_5}{k_2 + k_5} [XCoA][AT]_o}{\frac{k_5(k_{-1} + k_2)}{k_1(k_2 + k_5)} + [XCoA]}$$

Thus,

$$k_{cat} = \frac{k_2 k_5}{k_2 + k_5} \quad K_M = \frac{k_5(k_{-1} + k_2)}{k_1(k_2 + k_5)} \quad k_{cat}/K_M = \frac{k_1 k_2}{k_{-1} + k_2}$$

**Transacylation:**

$$\boxed{k_{cat}/K_M = \frac{k_1 k_2}{k_{-1} + k_2} \quad k_{cat} = \frac{k_2 k_3 [ACP] k_4}{k_2 k_3 [ACP] + k_2 k_4 + k_3 [ACP] k_4}}$$

$$\frac{d[X-ACP]}{dt} = k_4 [AT-X \cdot ACP]$$

$$\frac{d[AT-X \cdot ACP]}{dt} = k_3 [AT-X][ACP] - k_4 [AT-X \cdot ACP]$$

$$\frac{d[AT-X]}{dt} = k_2 [AT \cdot XCoA] - k_3 [ACP][AT-X]$$

As above,

$$[AT \cdot XCoA] = \frac{\frac{k_1 [XCoA]}{k_{-1} + k_2} ([AT]_o - [AT-X] - [AT-X \cdot ACP])}{1 + \frac{k_1 [XCoA]}{k_{-1} + k_2}}$$

$$\frac{d[AT-X]}{dt} = \frac{\frac{k_1 k_2 [XCoA]}{k_{-1} + k_2} ([AT]_o - [AT-X] - [AT-X \cdot ACP])}{1 + \frac{k_1 [XCoA]}{k_{-1} + k_2}} - k_3 [ACP][AT-X] \cong 0$$

$$[AT-X] = \frac{k_1 k_2 [XCoA] ([AT]_o - [AT-X \cdot ACP])}{k_1 k_2 [XCoA] + (k_{-1} + k_2) k_3 [ACP] + k_1 k_3 [ACP][XCoA]}$$

$$\frac{d[AT-X \cdot ACP]}{dt} = k_3 [ACP] \frac{k_1 k_2 [XCoA] ([AT]_o - [AT-X \cdot ACP])}{k_1 k_2 [XCoA] + (k_{-1} + k_2) k_3 [ACP] + k_1 k_3 [ACP][XCoA]} - k_4 [AT-X \cdot ACP] \cong 0$$

$$[AT-X \cdot ACP] = \frac{k_1 k_2 k_3 [ACP] [XCoA] [AT]_0}{[XCoA] (k_1 k_2 k_3 [ACP] + k_1 k_2 k_4 + k_1 k_3 [ACP] k_4) + k_3 [ACP] k_4 (k_{-1} + k_2)}$$

$$\frac{d[X-ACP]}{dt} = \frac{\frac{k_2 k_3 [ACP] k_4 [XCoA] [AT]_0}{(k_2 k_3 [ACP] + k_2 k_4 + k_3 [ACP] k_4)}}{[XCoA] + \frac{k_3 [ACP] k_4 (k_{-1} + k_2)}{(k_1 k_2 k_3 [ACP] + k_1 k_2 k_4 + k_1 k_3 [ACP] k_4)}}$$

Thus,

$$k_{cat} = \frac{k_2 k_3 [ACP] k_4}{k_2 k_3 [ACP] + k_2 k_4 + k_3 [ACP] k_4} \quad K_M = \frac{k_3 [ACP] k_4 (k_{-1} + k_2)}{(k_1 k_2 k_3 [ACP] + k_1 k_2 k_4 + k_1 k_3 [ACP] k_4)} \quad k_{cat}/K_M = \frac{k_1 k_2}{k_{-1} + k_2}$$



## Supplemental Figures

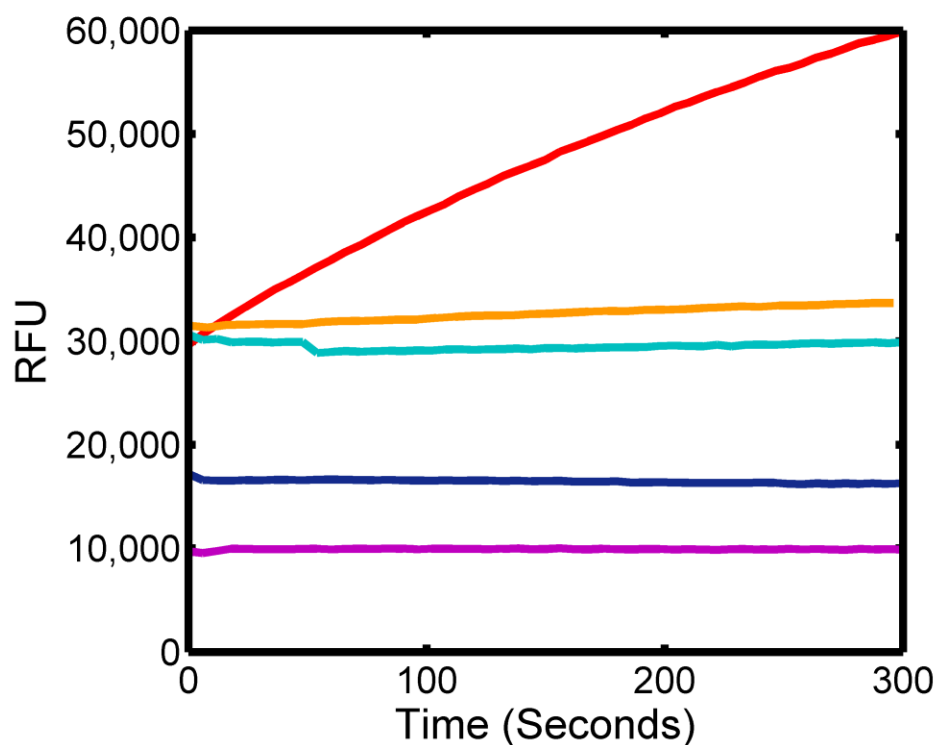

**Figure S1. Example progress curves for the coupled reaction and relevant controls:** the complete DEBS AT3/ACP3/MMCoA/ $\alpha$ KGDH reaction (red), without AT (orange), without MMCoA (cyan), without NAD<sup>+</sup> (blue), and without  $\alpha$ KGDH (purple). Reactions were run as described above. RFU: Relative Fluorescence Units.

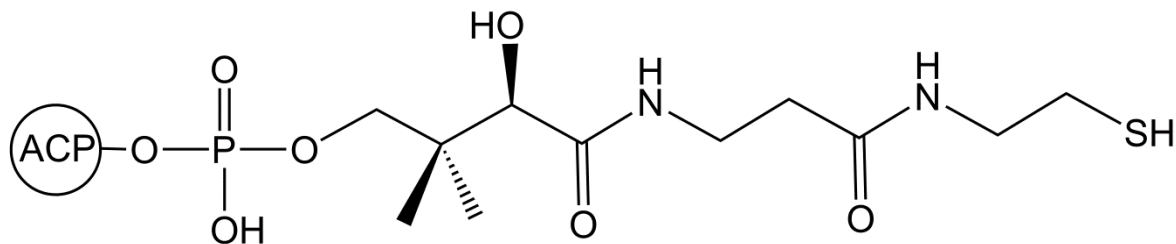

**Figure S2. Catalytically active, phosphopantetheinylated *holo*-ACP.** The nucleophilic thiol residue is responsible for attack of the acyl enzyme intermediate during transacylation. *Apo*-ACP is not phosphopantetheinylated and is thus not catalytically active.

## References

1. Chen, A.Y., Cane, D.E., and Khosla, C. (2007) Structure-based dissociation of a type I polyketide synthase module, *Chem. Biol.* 14, 784-792.
2. Kim, C.Y., Alekseyev, V.Y., Chen, A.Y., Tang, Y., Cane, D.E., and Khosla, C. (2004) Reconstitution modular activity from separated domains of 6-Deoxyerythronolide B Synthase, *Biochemistry* 43, 13892-13898.
3. Wong, F.T., Chen, A.Y., Cane, D.E., and Khosla, C. (2010) Protein-protein recognition between acyltransferases and acyl carrier proteins in multimodular polyketide synthases, *Biochemistry* 49, 95-102.
4. Pfeifer, B. A., Admiraal, S. J., Gramajo, H., Cane, D. E., and Khosla, C. (2001) Biosynthesis of complex polyketides in a metabolically engineered strain of *E. coli*, *Science* 291, 1790-1792.
5. Chen, A. Y., Schnarr, N. A., Kim, C. Y., Cane, D. E., and Khosla, C. (2006) Extender unit and acyl carrier protein specificity of ketosynthase domains of the 6-deoxyerythronolide B synthase, *J Am Chem Soc* 128, 3067-3074.
6. Molnos, J., Gardiner R., Dale, G.E., and Lange, R. (2003) A continuous coupled enzyme assay for bacterial malonyl-CoA:acyl carrier protein transacylase (FabD), *Analytical Biochemistry* 319, 171-176.
